# Supplementary material for: Combining oxyanionic polymerization and click-chemistry: a general strategy for the synthesis of polyether polyol macromonomers
Source: Royal Society of Chemistry journal article supplement (doi:10.1039/c3py01078c), 2013-09-26
Supplement: c3py01078c.pdf [file c3py01078c.pdf]

## Supporting Information

### Combining Oxyanionic Polymerization and Click-Chemistry:

### A General Strategy for Polyether Polyol Macromonomers

Anja Thomas,<sup>1</sup> Kerstin Niederer,<sup>1</sup> Frederik Wurm<sup>2</sup> and Holger Frey\*<sup>1</sup>

<sup>1</sup>Johannes Gutenberg University, Duesbergweg 10-14, 55128 Mainz, Germany

<sup>2</sup>Max Planck Institute for Polymer Research, Ackermannweg 10, 55128 Mainz, Germany

#### **(D,L-1,2-Isopropylidene glyceryl glycidyl ether) (IGG)**

The epoxide monomer (DL-1,2-isopropylidene glyceryl glycidyl) ether (IGG) was synthesized according to a literature procedure.<sup>1</sup> In brief, epichlorohydrine and D,L-1,2-isopropylidene glycerol (solketal) were reacted in a phase transfer reaction. After several washing steps, the solvent was removed. The crude product was purified via distillation under reduced pressure.

<sup>1</sup>H NMR (CDCl<sub>3</sub>, 400 MHz)  $\delta$  (ppm) = 4.3 (m, 1H, CH acetal), 4.07 (m, 1H, CH epoxid), 3.88 – 3.39 (m, 4H, CH<sub>2</sub>) 3.17 (m, 2H CH<sub>2</sub> acetal), 2.81 (t, 1H, CH<sub>2</sub> epoxide), 2.63 (q, 1H, CH<sub>2</sub> epoxide), 1.44 (s, 3H, CH<sub>3</sub>), 1.38 (s, 3H, CH<sub>3</sub>)

#### **1-Azido-6-hydroxyhexane**

1-Azido-6-hydroxyhexane was prepared as reported previously.<sup>2</sup> Sodium azide (4.87 g, 0.07 mol, 2 eq.) was dissolved in water (20 mL) and subsequently 1-chloro-6-hydroxyhexane (5 mL, 0.04

mol, 1 eq.) was added via syringe. After stirring over night at 80 °C, the mixture was cooled down to room temperature and extracted with diethyl ether (3 x 50 mL). The combined ether phases were dried over anhydrous sodium sulfate (Na<sub>2</sub>SO<sub>4</sub>), filtered and the solvent was removed under vacuum. To react residual 1-chloro-6-hydroxyhexane, the crude product was again dissolved in water (40 mL) and sodium azide was added (2.45 g, 0.04 mol, 1 eq.). The mixture was refluxed over night and purified as described above. After removal of residual solvent in a vacuum desiccator at 40 mbar over night the product was obtained as a colorless liquid (4.45 g, 83%).

<sup>1</sup>H NMR (CDCl<sub>3</sub>, 400 MHz) δ (ppm) = 3.64 (t, 2H, HOCH<sub>2</sub>, *J* = 6.5 Hz), 3.26 (t, 2H, N<sub>3</sub>CH<sub>2</sub>, *J* = 6.9 Hz), 1.65 – 1.54 (m, 4H, CH<sub>2</sub>), 1.43 – 1.34 (m, 4H, CH<sub>2</sub>)

### **1-Azido-3-hydroxypropane**

1-Azido-3-hydroxypropane was synthesized as reported elsewhere.<sup>3</sup> Sodium azide (15.55 g, 0.24 mol, 2 eq) and tetrabutyl ammonium hydrogensulfate (40 mg, 1.2 mmol, 0.01 eq) were dissolved in water (15 mL) in a round bottom flask equipped with a reflux condensor. 1-chloro-3-hydroxypropane was added via syringe and the mixture was stirred for 24 hrs at 80 °C. After cooling to room temperature water (20 mL) was added and the mixture extracted with diethyl ether (3 x 80 mL). The collected ether fractions were dried over Na<sub>2</sub>SO<sub>4</sub>, filtered and distilled under reduced pressure (35 °C, 0.02 mbar) to yield the pure product (11 g, 91%).

<sup>1</sup>H NMR (CDCl<sub>3</sub>, 400 MHz) δ (ppm) = 3.72 (t, 2H, HOCH<sub>2</sub>, *J* = 6.0 Hz), 3.43 (t, 2H, N<sub>3</sub>CH<sub>2</sub>, *J* = 6.6 Hz), 2.11 (s, 1H OH), 1.93 – 1.71 (m, 2H, CH<sub>2</sub>).

### **Azidoalkyl methacrylate**

Azidoalkylmethacrylates were prepared similar to a literature procedure.<sup>3</sup>  $\alpha$ -Azido- $\omega$ -hydroxyalkane (1 eq.), hydroquinone (5 mg) and triethyl amine (TEA, 1.3 eq.) were dissolved in dry dichloromethane (DCM) and cooled to 0°C in an ice bath. Methacryloyl chloride (1.2 eq.) was added slowly over a period of 10 minutes. The ice bath was removed and the mixture was stirred over night at room temperature. After extraction with 1M HCl (3 x 50 mL), 1M NaOH (2 x 50 mL) and brine (2x 50 mL) the organic phase was dried over Na<sub>2</sub>SO<sub>4</sub> and the solvent was evaporated under reduced pressure. The crude product was distilled twice (56 °C, 0.03 mbar) for azidopropyl methacrylate (AzPMA) or purified by column chromatography using hexanes and ethyl acetate (5:1.5) as eluent for azidohexyl methacrylate (AzHMA) to yield a colorless liquid.

#### AzPMA

Yield: 52%

<sup>1</sup>H NMR (CDCl<sub>3</sub>, 300 MHz)  $\delta$  (ppm) = 6.10 (m, 1H, CH<sub>2</sub>=C), 5.57 (m, 1H, CH<sub>2</sub>=C), 4.23 (t, 2H, CH<sub>2</sub>OOC,  $J$  = 6.2 Hz), 3.41 (t, 2H, CH<sub>2</sub>N<sub>3</sub>,  $J$  = 6.7 Hz), 2.05 – 1.86 (m, 5H, CH<sub>3</sub> + CH<sub>2</sub>).

#### AzHMA

Yield: 44%

<sup>1</sup>H NMR (CDCl<sub>3</sub>, 300 MHz)  $\delta$  (ppm) = 6.07 (m, 1H, CH<sub>2</sub>=C), 5.53 (m, 1H, CH<sub>2</sub>=C), 4.12 (t, 2H, CH<sub>2</sub>OOC,  $J$  = 6.6 Hz), 3.25 (t, 2H, CH<sub>2</sub>N<sub>3</sub>,  $J$  = 6.9 Hz), 1.92 (m, 3H, CH<sub>3</sub>), 1.74 – 1.50 (m, 4H, CH<sub>2</sub>), 1.49 – 1.25 (m, 4H, CH<sub>2</sub>).

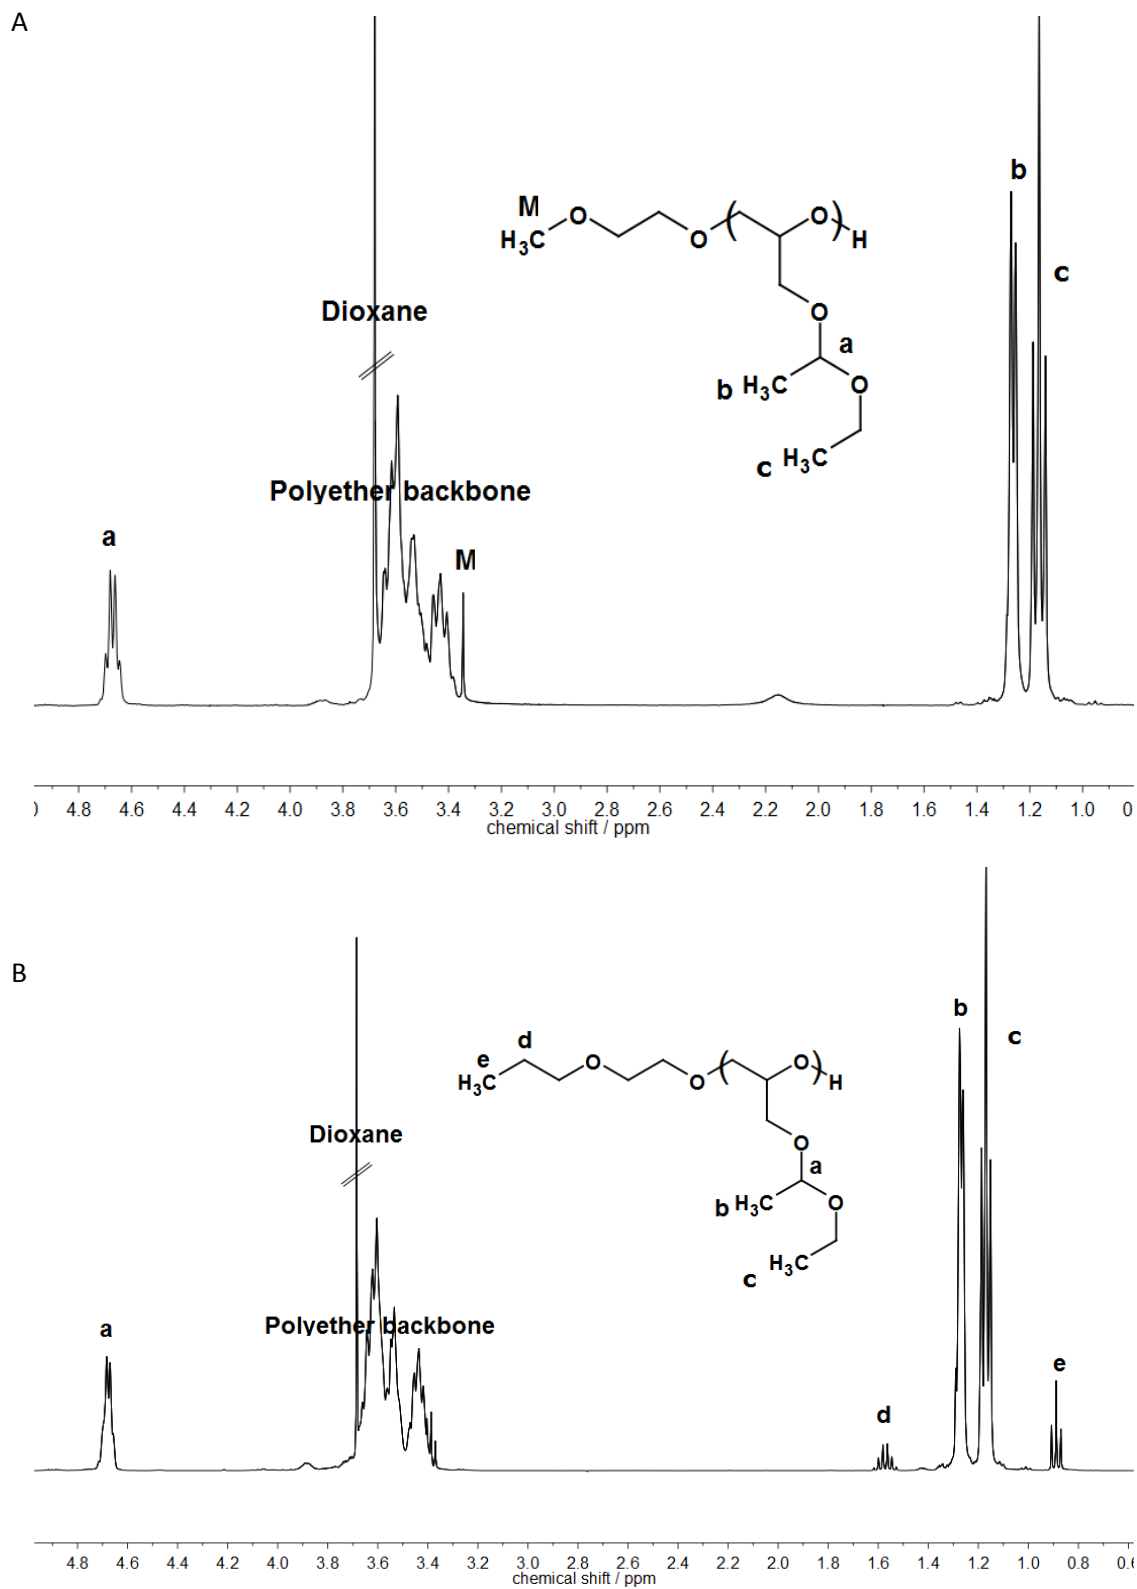

**Figure S1**  $^1\text{H}$  NMR spectra in  $\text{CDCl}_3$  of P(EEGE) using MeOH (A, 300 MHz) or PEtOH (B, 400 MHz) as initiator.

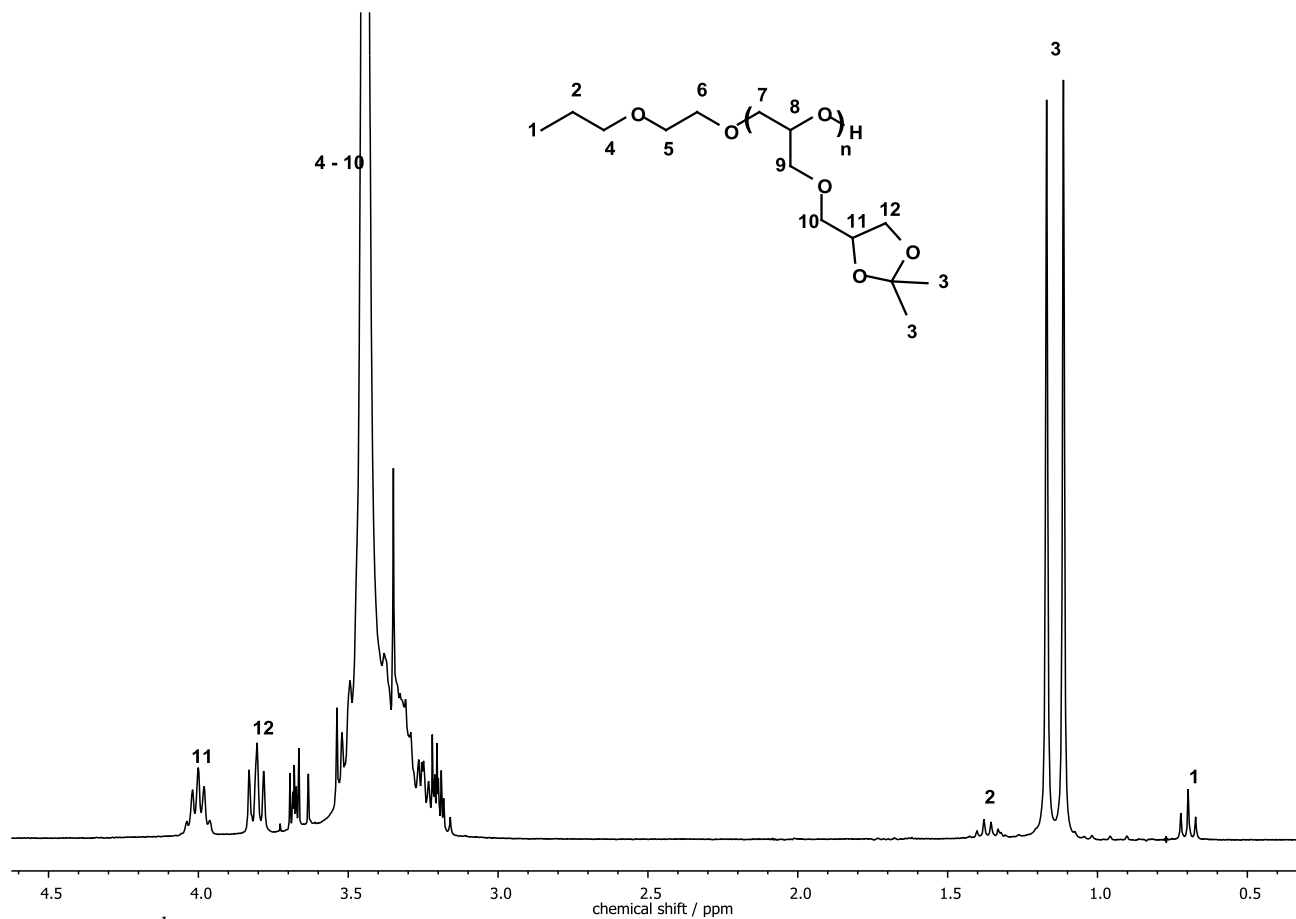

**Figure S2.** <sup>1</sup>H NMR spectrum in CDCl<sub>3</sub> of P(IGG) using PEtOH as initiator (300 MHz)

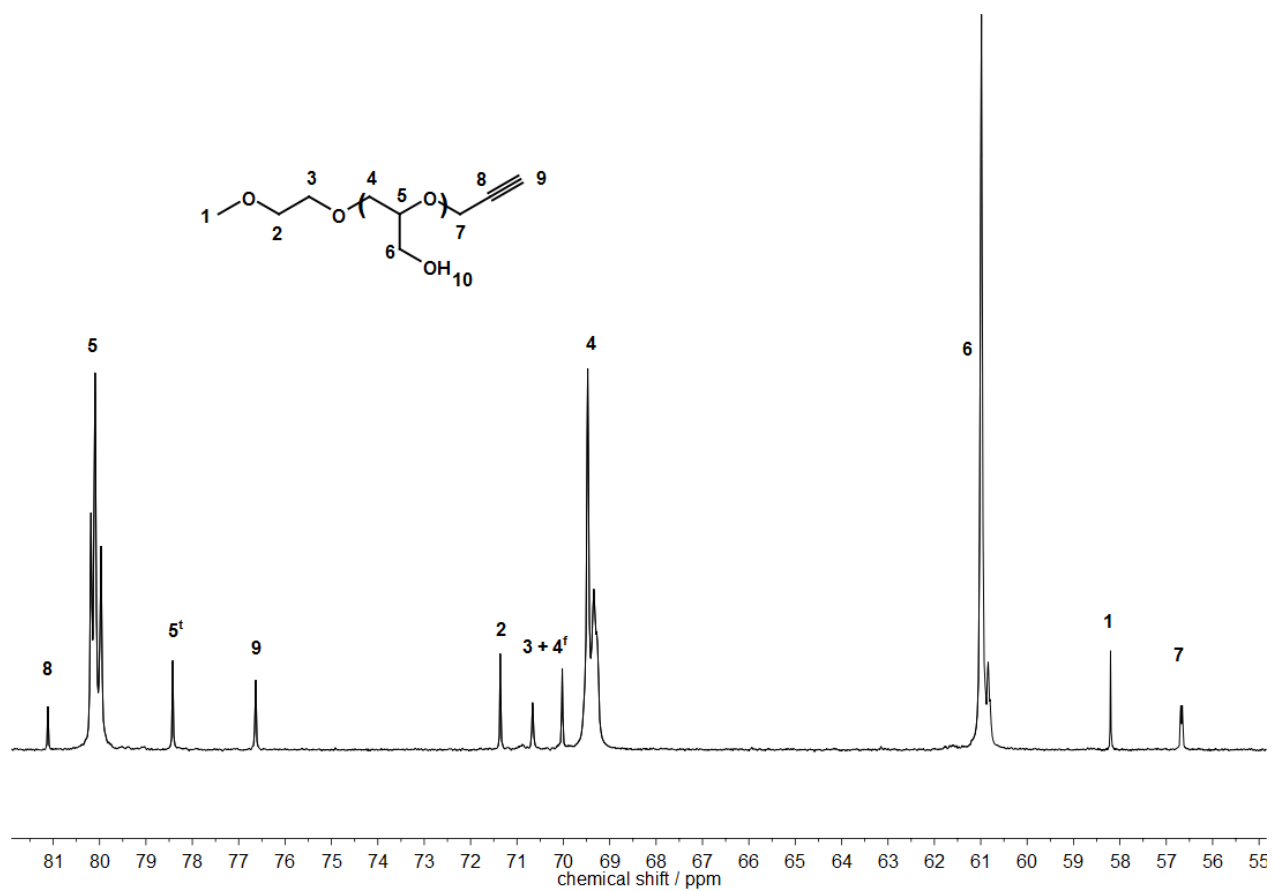

**Figure S3.** <sup>13</sup>C-NMR spectrum for *lin*PPG<sub>24</sub> (100 MHz, DMSO-*d*<sub>6</sub>).

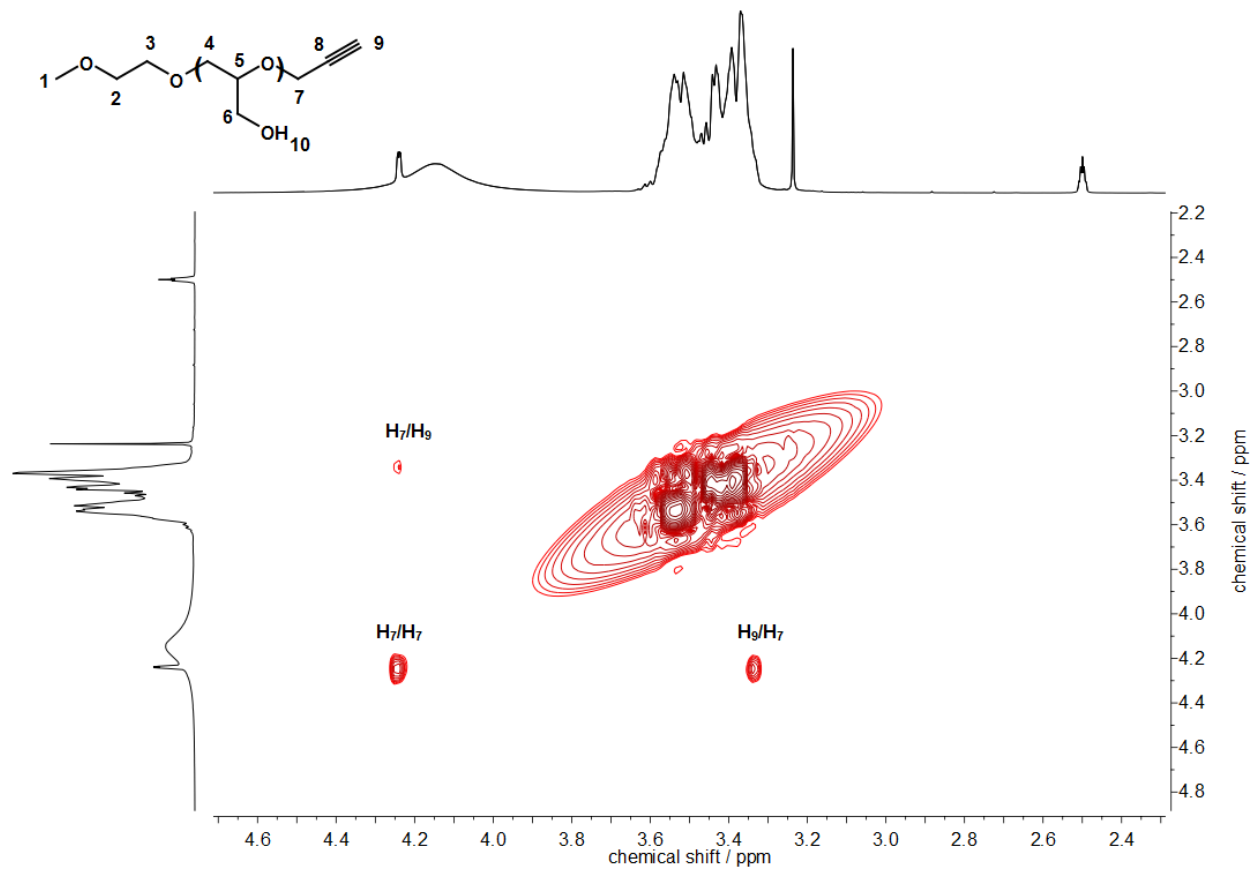

**Figure S4.** COSY NMR spectrum of *linPPG*<sub>24</sub> in DMSO-*d*<sub>6</sub>.

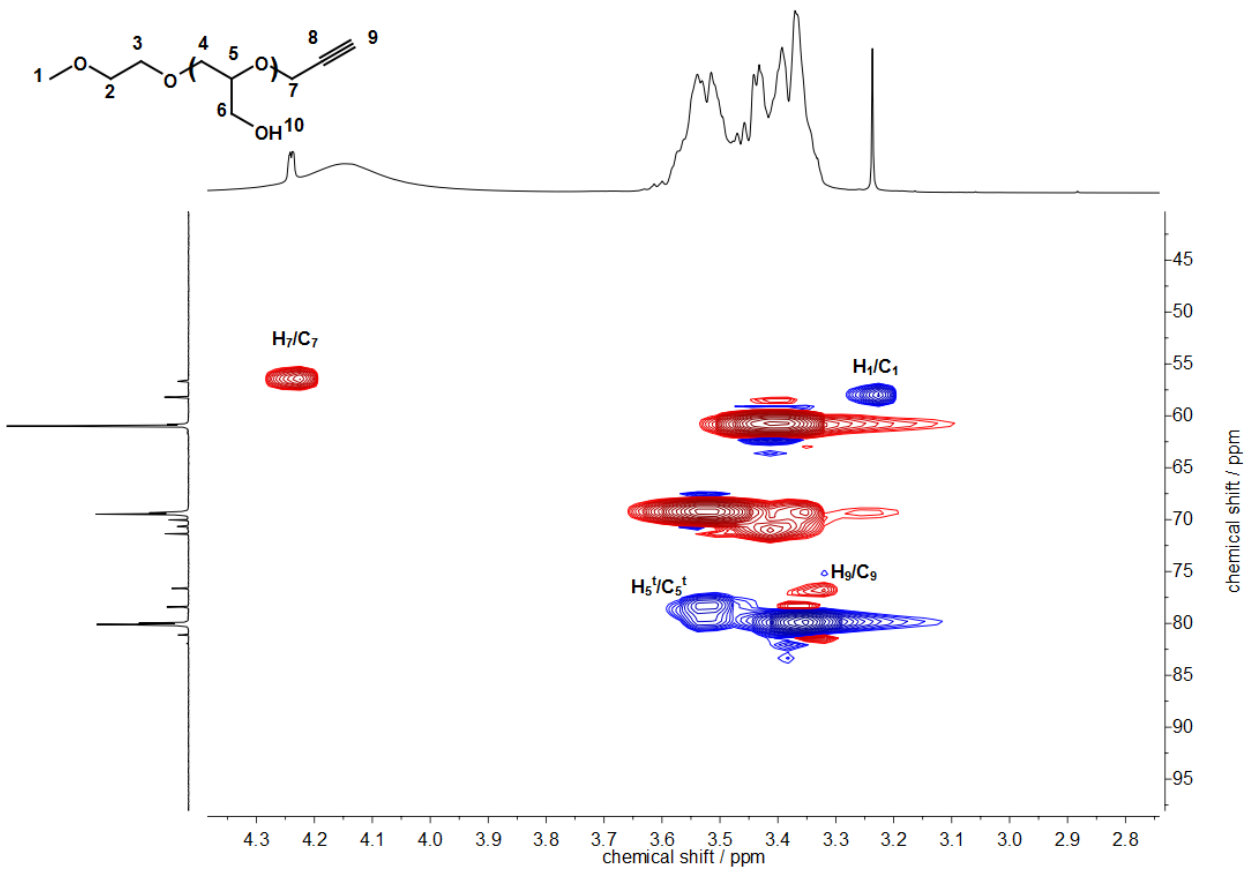

**Figure S5.** HSQC NMR spectrum for *linPPG*<sub>24</sub> in DMSO-*d*<sub>6</sub>.



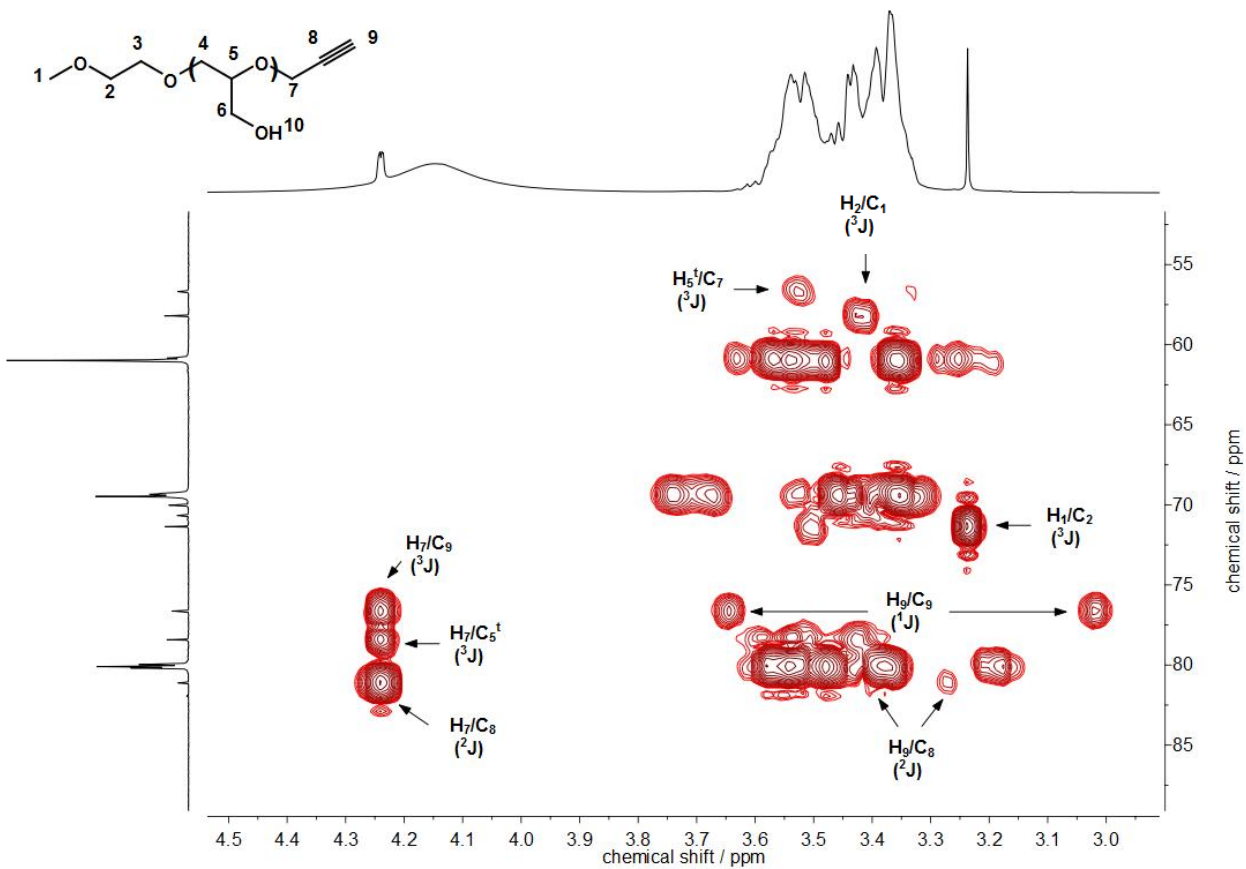

**Figure S6.** HMBC NMR spectrum for *linPPG*<sub>24</sub> in DMSO-*d*<sub>6</sub>.

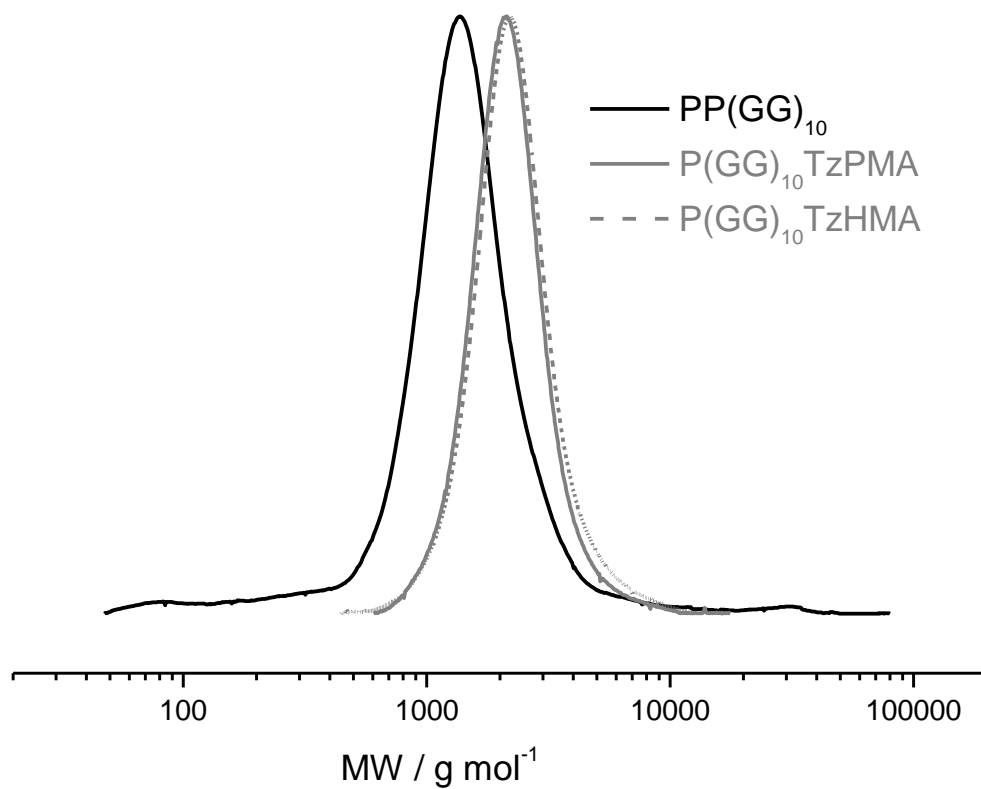

**Figure S7.** SEC for PP(GG)<sub>10</sub> (black solid line, sample XI, table 1), P(GG)<sub>10</sub>TzPMA (grey solid line, cf. table 2) and P(GG)<sub>10</sub>TzHMA (grey dashed line, cf. table 2). SEC in DMF, PEG standards, RI signal.

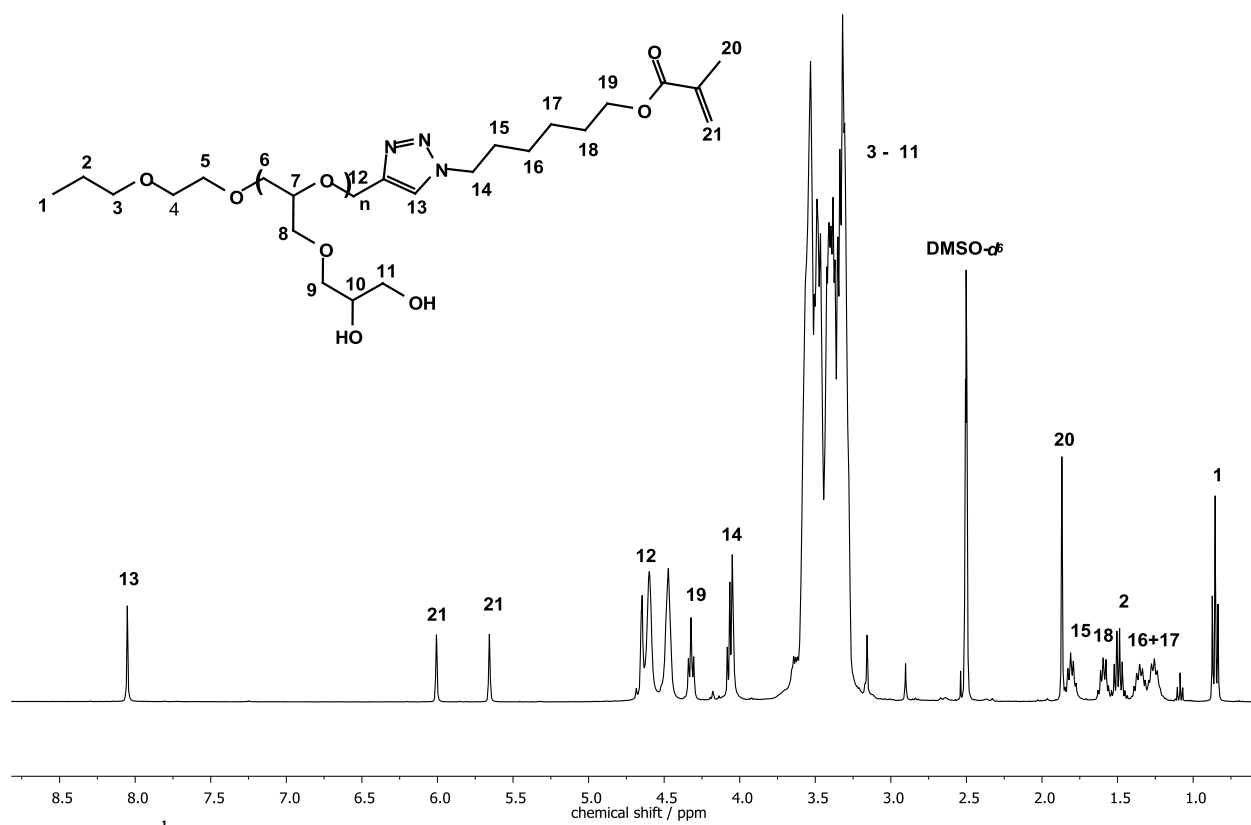

**Figure S8.** <sup>1</sup>H-NMR spectrum of P(GG)<sub>10</sub>TzHMA (Table 2) in DMSO-*d*<sub>6</sub>, 400 MHz.

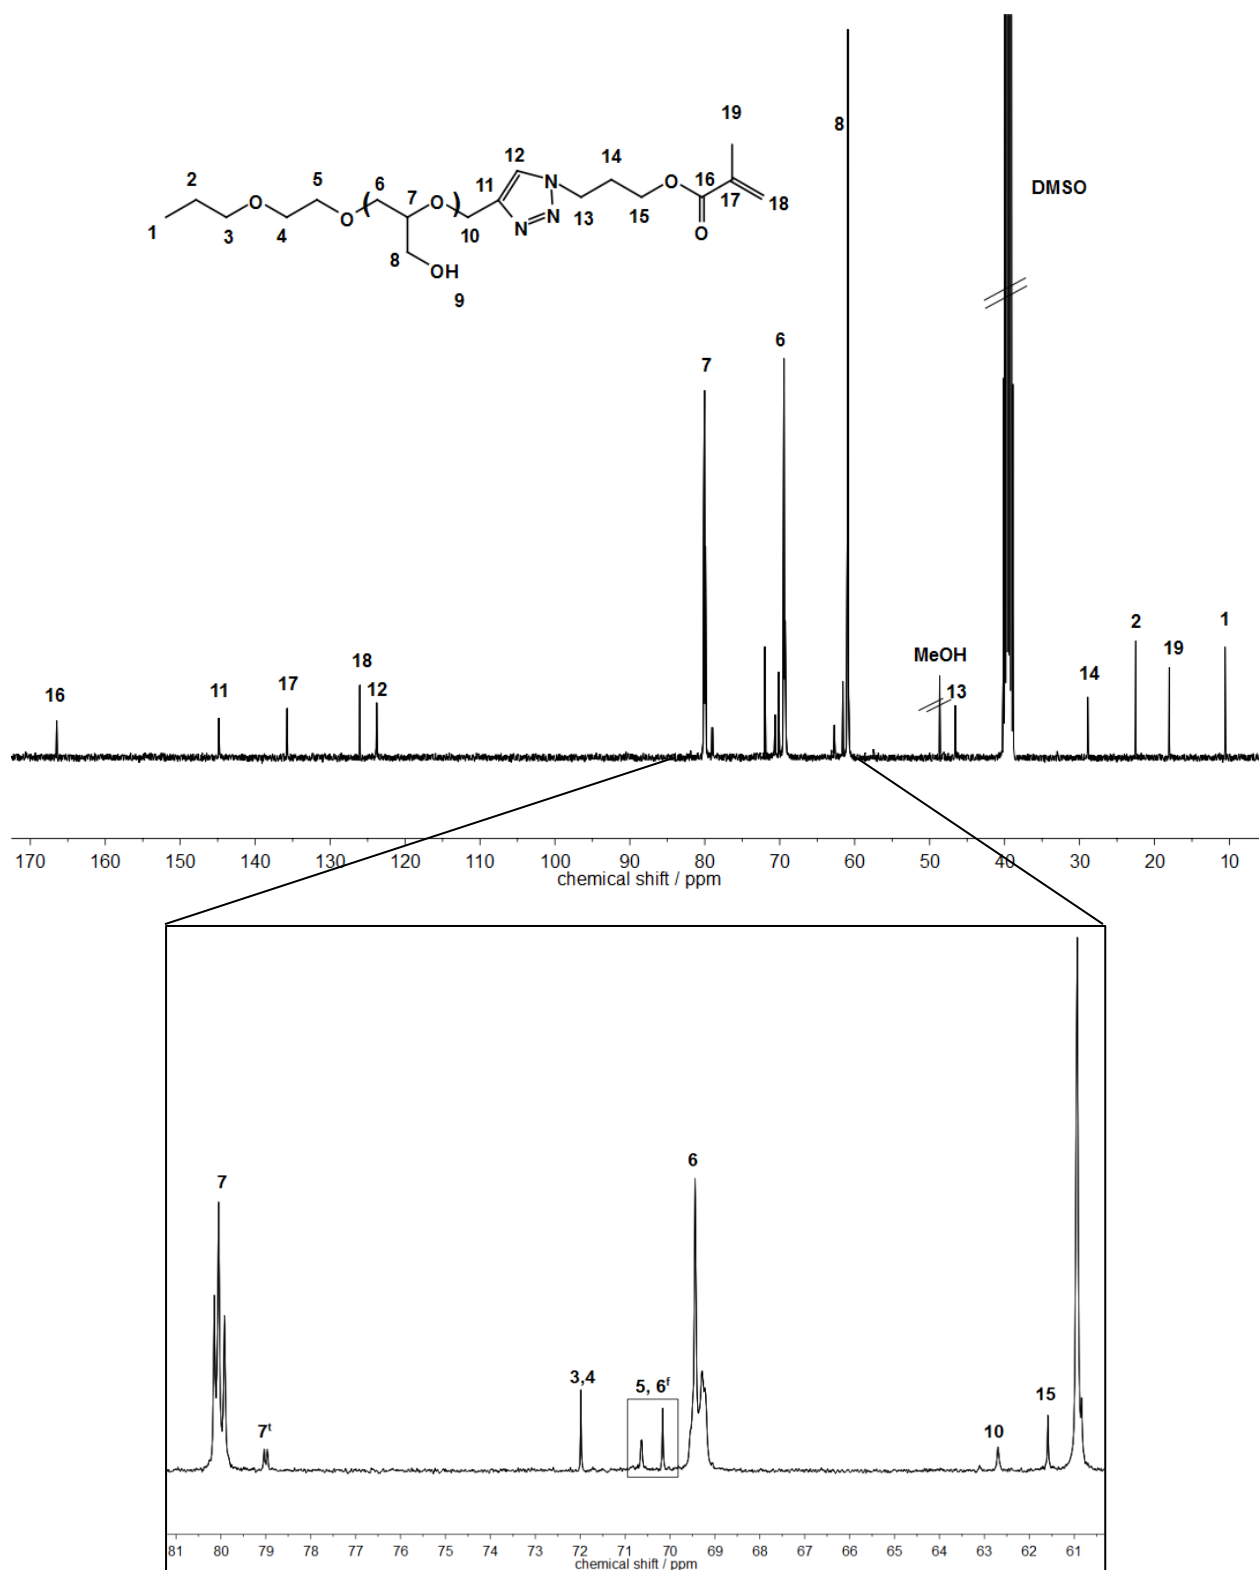

**Figure S9.**  $^{13}\text{C}$ -NMR spectrum for *linPG*<sub>22</sub>TzPMA (100 MHz, DMSO- $d_6$ ).

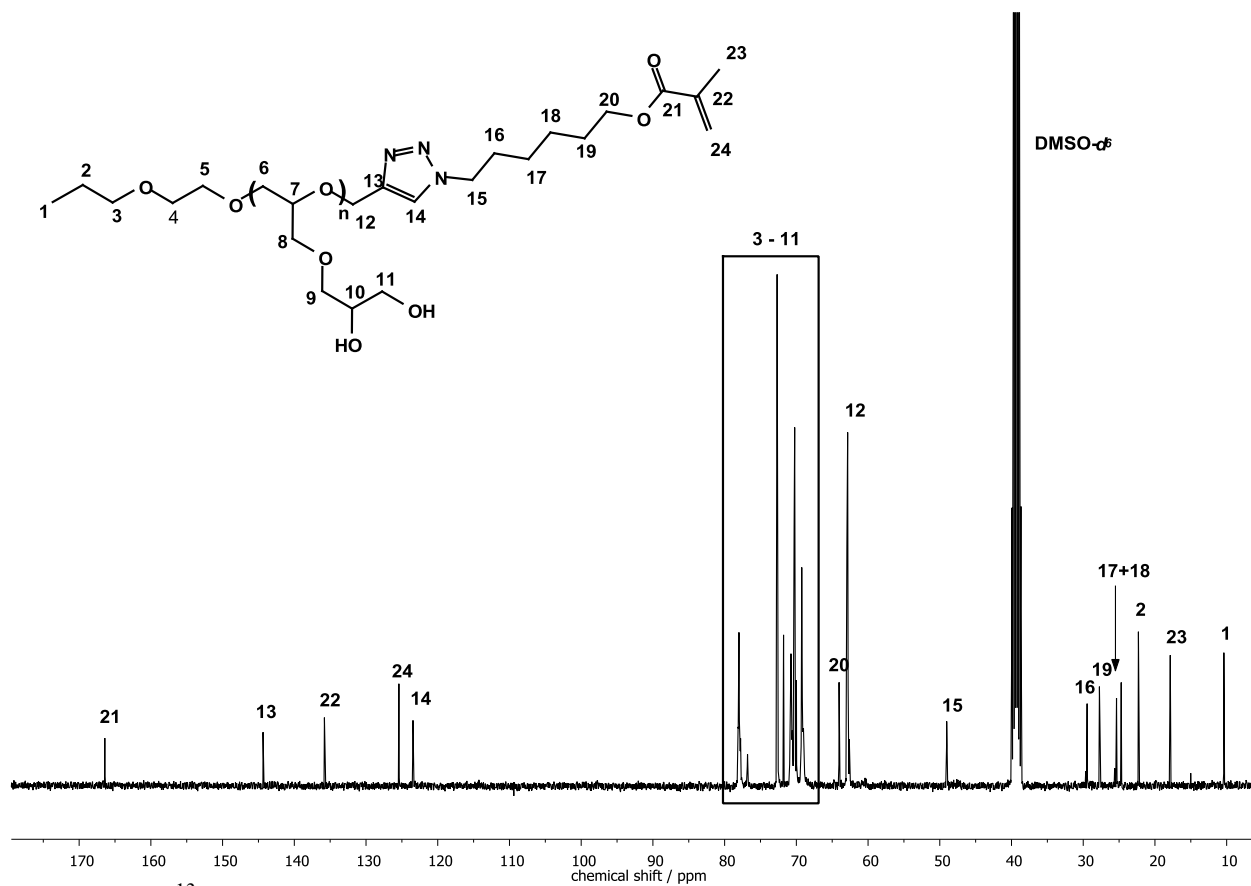

**Figure S10.**  $^{13}\text{C}$  NMR spectrum of  $\text{P}(\text{GG})_{10}\text{TzHMA}$  in  $\text{DMSO-}d_6$ , 100 MHz.

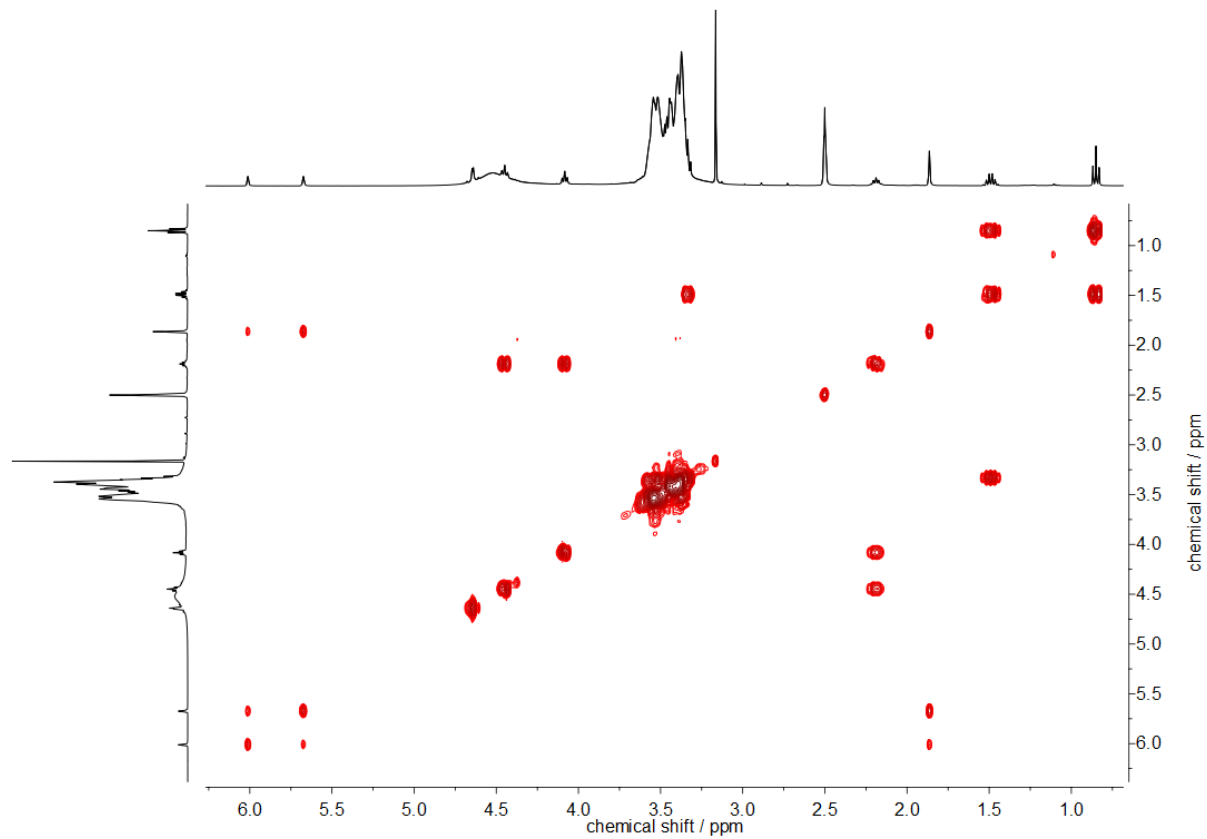

**Figure S11.** COSY NMR spectrum of *linPG*<sub>22</sub>TzPMA (400 MHz, DMSO-*d*<sub>6</sub>).

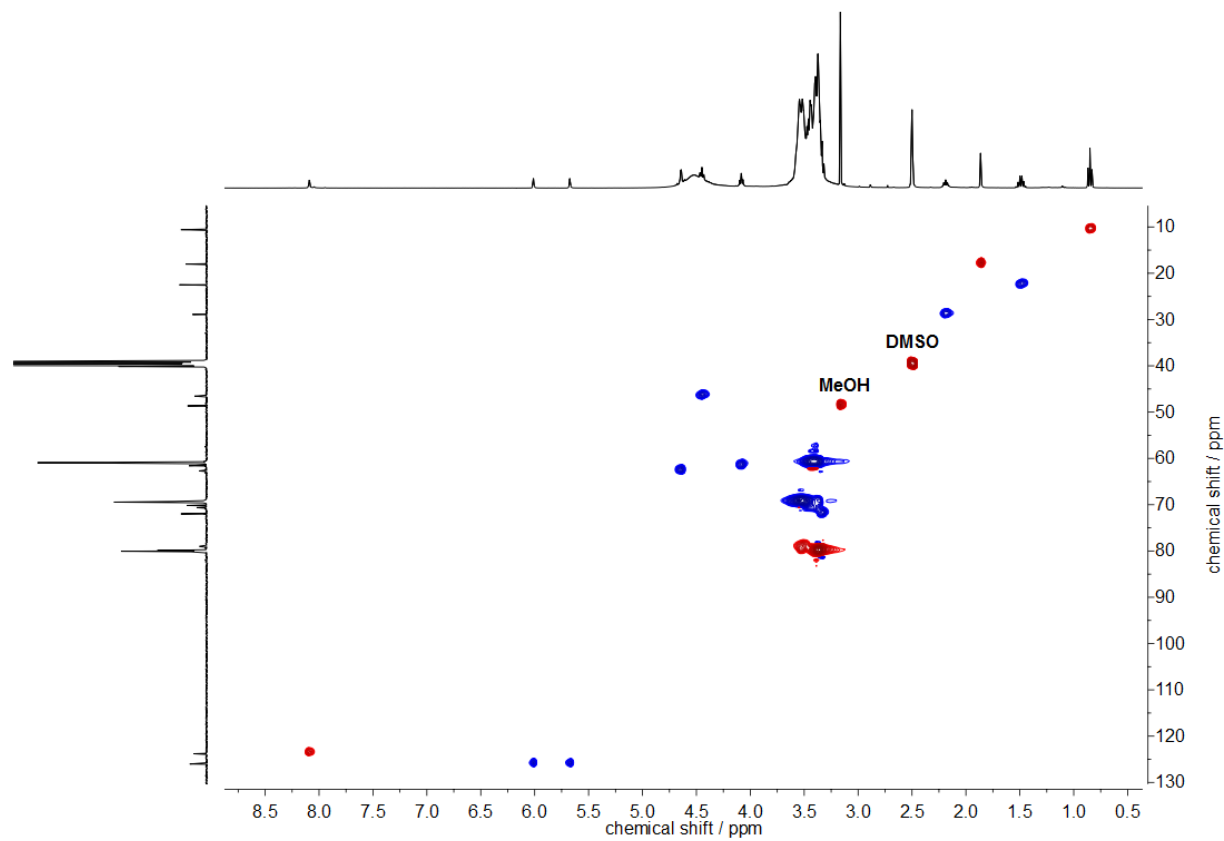

**Figure S12.** HSQC NMR spectrum for *linPG*<sub>22</sub>TzPMA (400 MHz, DMSO-*d*<sub>6</sub>).

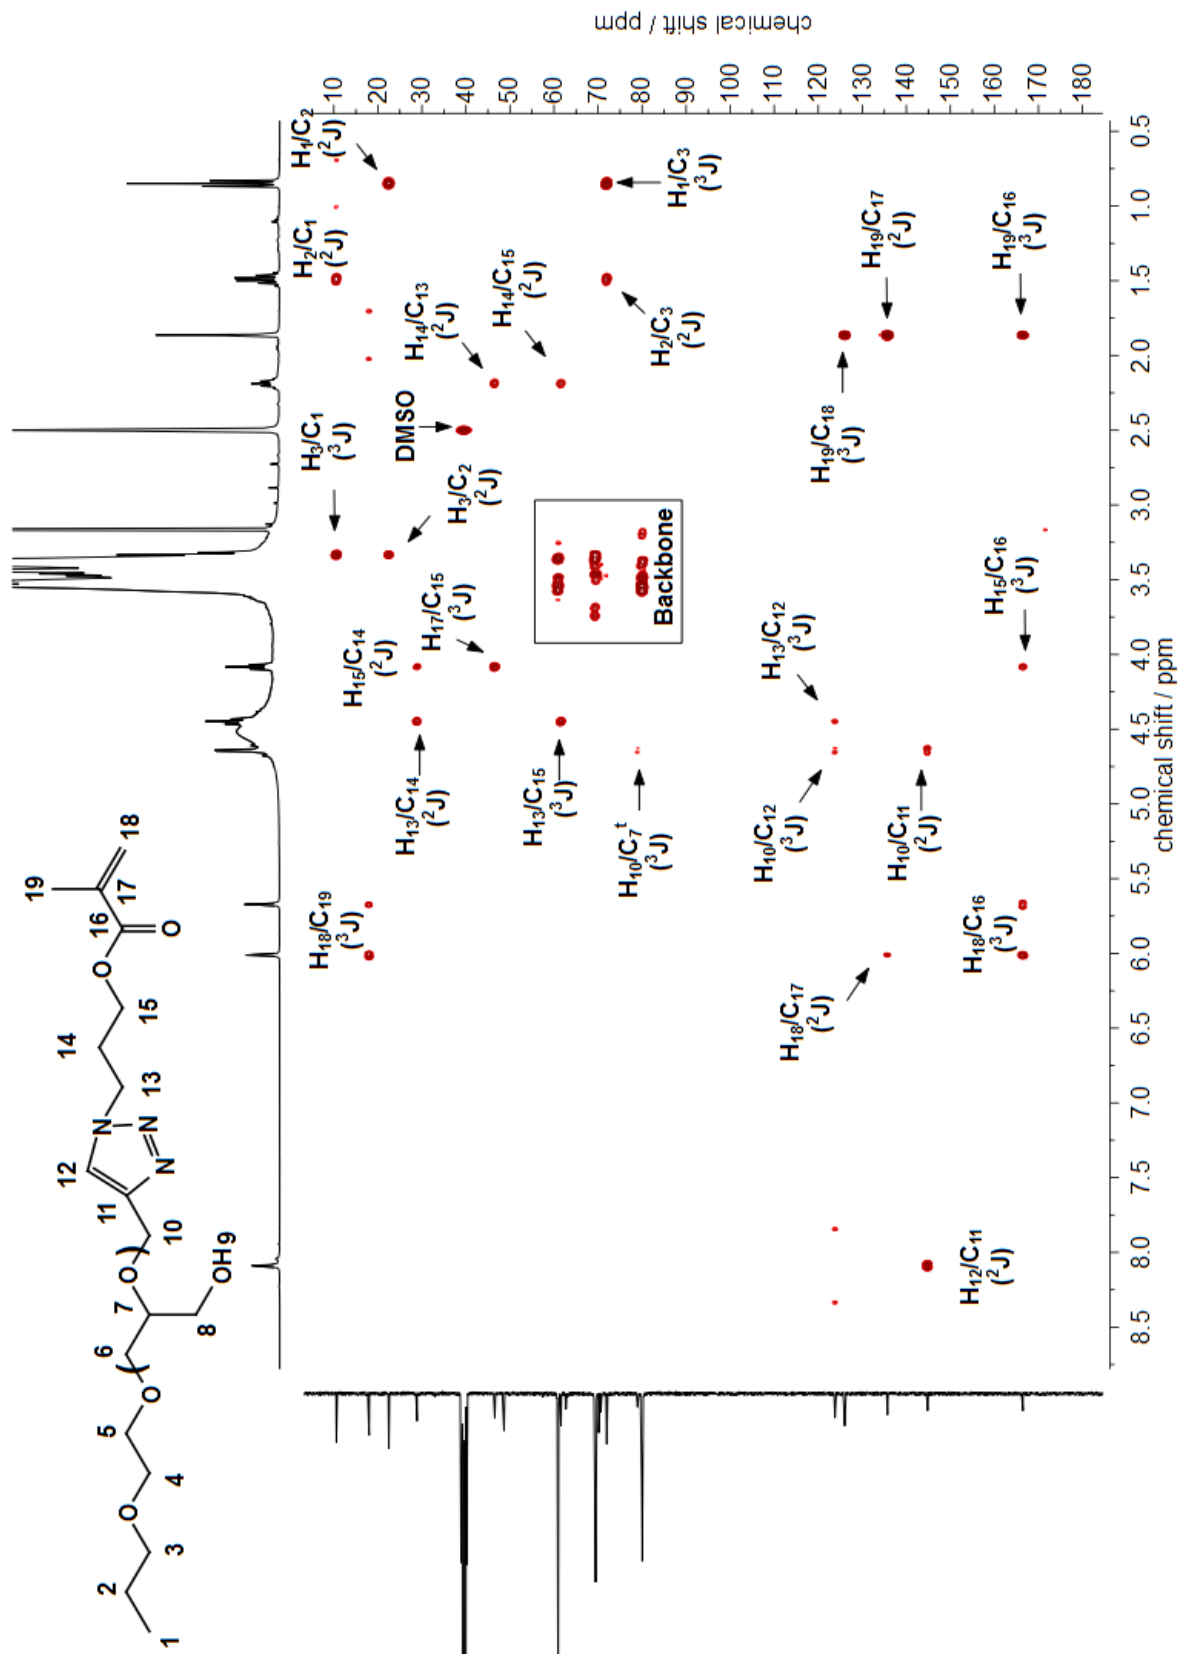

Figure S13. HMBC NMR spectrum for *linPG*<sub>22</sub>TzPMA in DMSO-*d*<sub>6</sub> (400 MHz).



A)

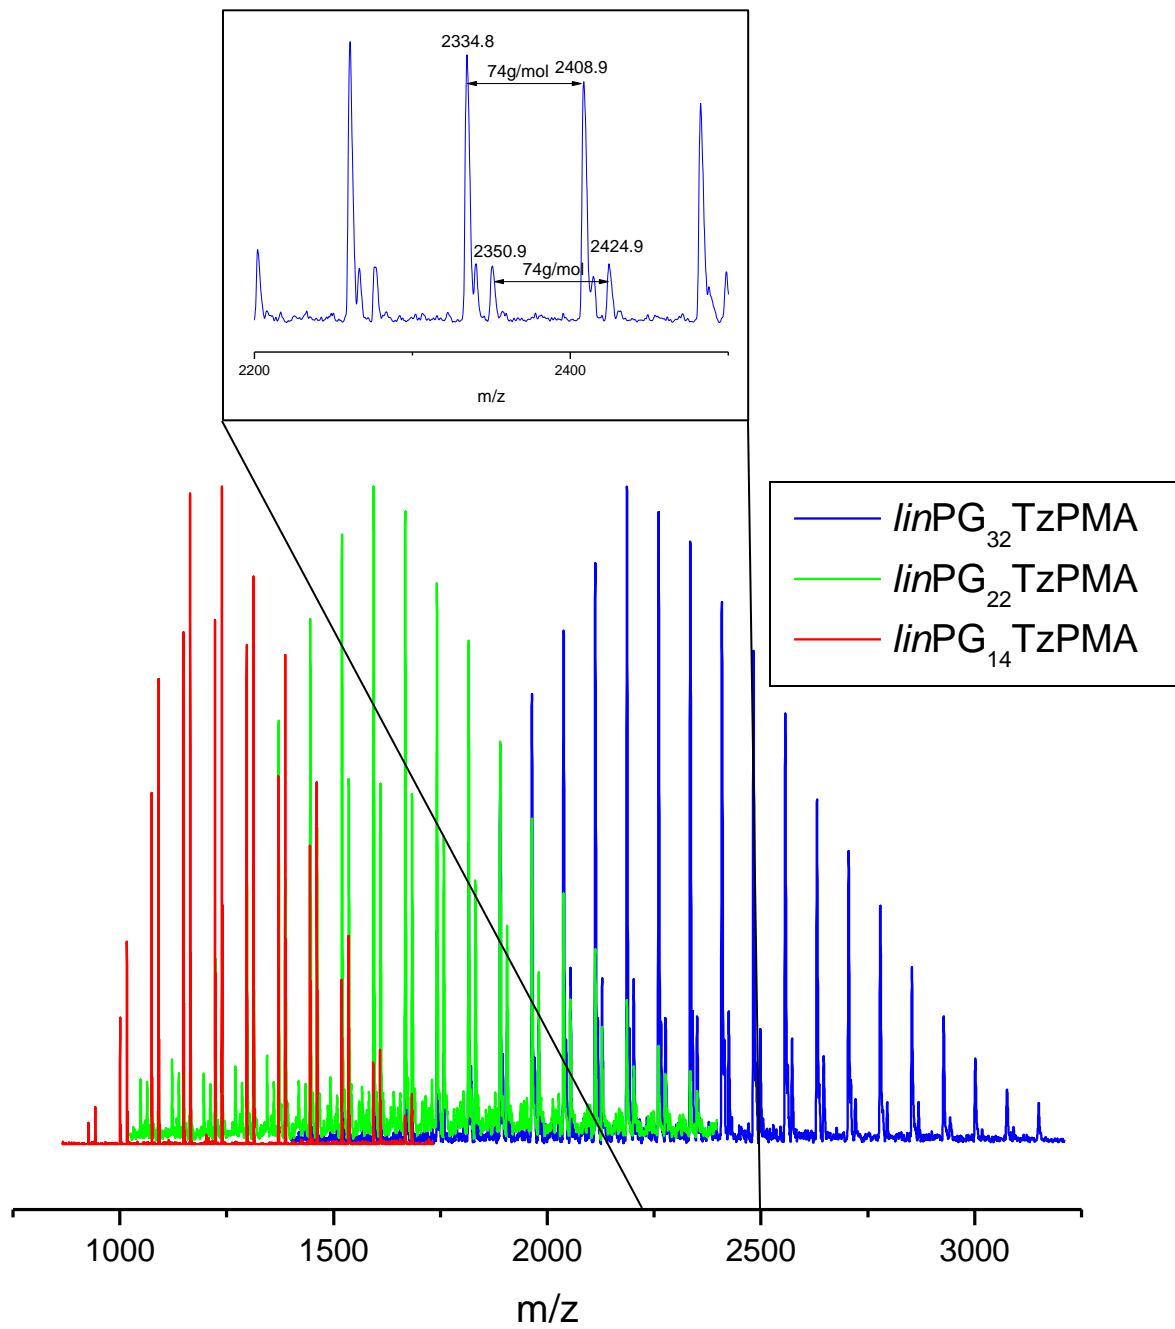

B)

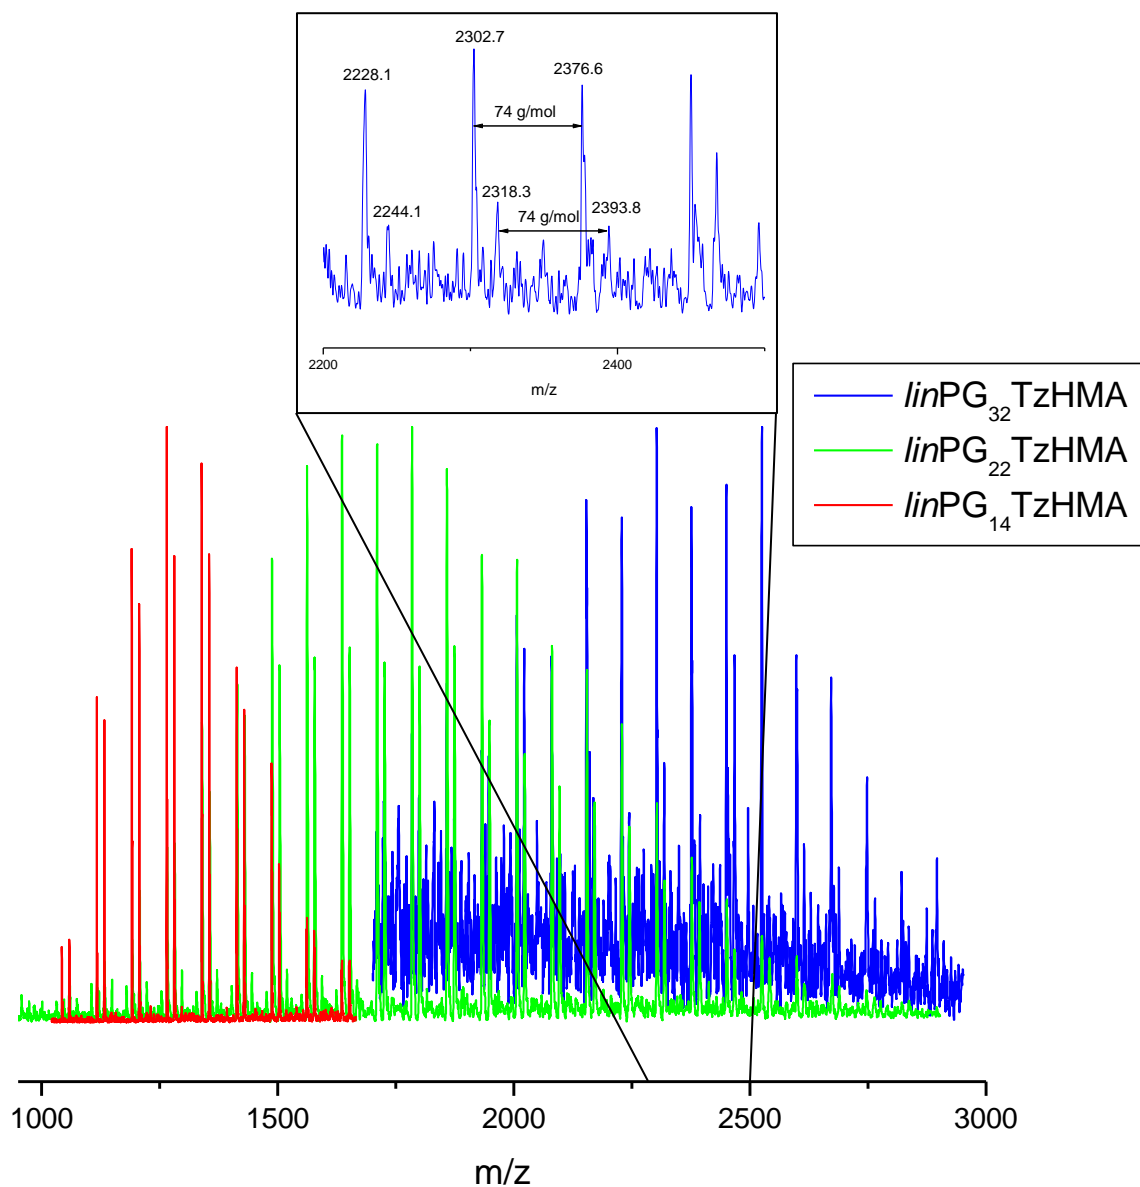

**Figure S14.** A) MALDI-ToF spectra of *linPG*<sub>14</sub>TzPMA (red) *linPG*<sub>22</sub>TzPMA (green) *linPG*<sub>32</sub>TzPMA (blue) and B) *linPG*<sub>14</sub>TzHMA (red,) *linPG*<sub>22</sub>TzHMA (green) *linPG*<sub>32</sub>TzHMA (blue). The distributions represent the desired macromonomer structures ionized with sodium and potassium, with the mass difference being exactly 74 g/mol (mass of one glycerol unit) for both the sodium and the potassium distribution.

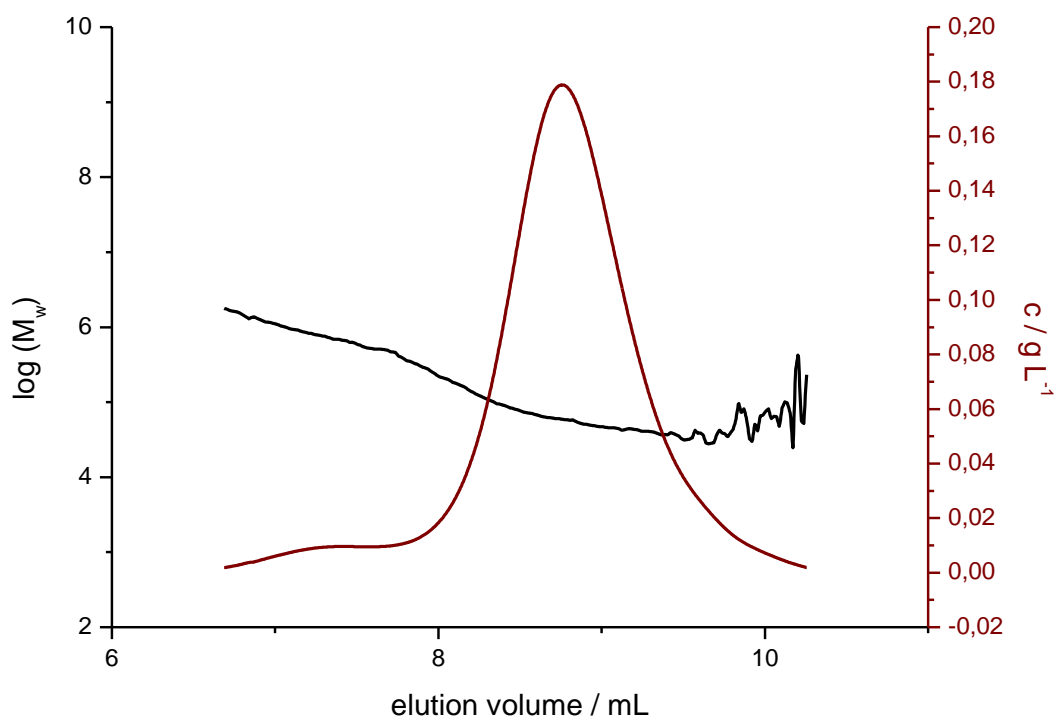

**Figure S15.** SEC-MALLS measurement for P(linPG<sub>32</sub>TzHMA), sample XVI, table 3.

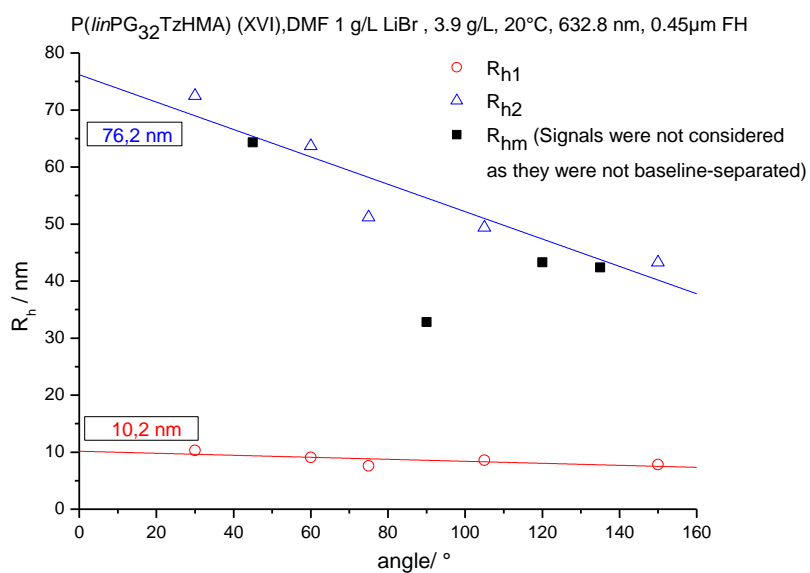

**Figure S16.** DLS measurement for P(linPG<sub>32</sub>TzHMA), sample XVI, table 3.

1. F. Wurm, J. Nieberle and H. Frey, *Macromolecules*, 2008, **41**, 1909-1911.
2. Y. Li and B. C. Benicewicz, *Macromolecules*, 2008, **41**, 7986-7992.
3. B. S. Sumerlin, N. V. Tsarevsky, G. Louche, R. Y. Lee and K. Matyjaszewski, *Macromolecules*, 2005, **38**, 7540-7545.
